# Supplementary material for: Luminescence switch based on the acid/base induced reversibility of covalent bonds in lanthanide(iii) complexes
Source: Royal Society of Chemistry journal article supplement (doi:10.1039/d1cc04567a), 2021-01-01
Supplement: d1cc04567a1.pdf [file d1cc04567a1.pdf]

## Supporting Information

# Luminescence switch based on the acid/base induced reversibility of covalent bonds in lanthanide(III) complexes

Chihiro Kachi-Terajima,<sup>\*a,b</sup> Miku Okubo,<sup>a</sup> Mari Ikeda<sup>c</sup> and Yoichi Habata<sup>a,b</sup>

<sup>a</sup> Department of Chemistry, Faculty of Science, Toho University, 2-2-1 Miyama, Funabashi, Chiba 274-8510, Japan.

<sup>b</sup> Research Center for Materials with Integrated Properties, Toho University, 2-2-1 Miyama, Funabashi, Chiba 274-8510, Japan.

<sup>c</sup> Education Centre, Faculty of Engineering, Chiba Institute of Technology, 2-1-1 Shibazono, Narashino, Chiba 275-0023, Japan.

\*Prof. Dr. C. Kachi-Terajima

E-mail: [chihiro.kachi@chem.sci.toho-u.ac.jp](mailto:chihiro.kachi@chem.sci.toho-u.ac.jp)

## Experimental Section

Infrared spectra were obtained using a JASCO FT/IR-4100 spectrophotometer. Elemental analyses were conducted using a J-Science LAB JM-10 Micro Corder. UV-Vis absorption spectra were recorded on a JASCO V-630 spectrometer. Luminescence spectra were measured on a HORIBA SPEX Fluorolog-3 spectrofluorometer. Cold electrospray ionization mass spectrometry (ESI-MS) measurements were conducted using a JMS-T100CS system (JEOL).

### General Procedures and Materials.

All chemicals and solvents used in syntheses were of commercial grade and used without purification. The solvents for ESI-MS and photophysical measurements were dried over appropriate drying agents. Bis(benzimidazole-2-ylmethyl)amine (**HL**) was synthesized according to literature procedures.<sup>1</sup>

**TbLPhen.** A degassed methanol solution (2.0 mL) of **HL** (0.0444 g, 0.16 mmol) and 1,10-phenanthroline-2-carbaldehyde (**Phen**; 0.0333 g, 0.16 mmol) was stirred at room temperature for 1.5 h. To this solution was added terbium(III) nitrate hexahydrate (0.0725 g, 0.16 mmol), and the mixture was stirred for 3 h. The resulting pale-brown precipitate was collected by suction filtration and recrystallized by slow vapor diffusion of diethyl ether into methanol solution. Yield: 0.035 g (24%). Anal. calc. for  $C_{30}H_{25}N_{10}O_{10}Tb \cdot 3H_2O$ : C, 40.10; H, 3.48; N, 15.59. Found: C, 40.39; H, 3.28; N, 15.59. IR:  $\nu_{max}$  (KBr): 3404, 1625, 1508, 1454, 1384, 1292, 1115, 1087, 1038, 747  $cm^{-1}$ .

**GdLPhen.** The synthetic procedure for **GdLPhen** is similar to that of **TbLPhen**, using gadolinium(III) nitrate hexahydrate (0.0720 g, 0.16 mmol) instead of terbium(III) nitrate hexahydrate. Yield: 0.062 g (43%). Anal. calc. for  $C_{30}H_{25}GdN_{10}O_{10} \cdot 3H_2O$ : C, 40.18; H, 3.48; N, 15.62. Found: C, 40.33; H, 3.33; N, 15.43. IR:  $\nu_{max}$  (KBr) /  $cm^{-1}$ : 3358, 1625, 1517, 1452, 1384, 1291, 1114, 1087, 1029, 746.

**TbLQ.** A degassed methanol solution (1.0 mL) of **HL** (0.0113 g, 0.041 mmol) and 8-hydroxyquinoline-2-carbaldehyde (**Q**; 0.0072 g, 0.042 mmol) was stirred at room temperature for 1.5 h. To this solution was added a methanol solution (0.5 mL) of terbium(III) nitrate hexahydrate (0.0182 g, 0.040 mmol), and the mixture was stirred for 1 h. The resulting pale-yellow precipitate was collected by suction filtration and recrystallized by slow vapor diffusion of diethyl ether into methanol solution. Yield: 0.010

g (33 %). Anal. calc. for  $C_{27}H_{23}N_8O_8Tb \cdot 2.5MeOH$ : C, 42.87; H, 4.02; N, 13.56. Found: C, 42.44; H, 3.78; N, 13.70. IR:  $\nu_{max}$  (KBr): 3409, 1624, 1503, 1455, 1384, 1332, 1273, 1102, 745  $cm^{-1}$ .

**GdLQ.** The synthetic procedure for **GdLQ** is similar to that of **TbLQ**, using gadolinium(III) nitrate hexahydrate (0.0183 g, 0.041 mmol) instead of terbium(III) nitrate hexahydrate. Yield: 0.007 g (23 %). Anal. calc. for  $C_{27}H_{23}GdN_8O_8 \cdot 2H_2O$ : C, 43.06; H, 3.86; N, 13.85. Found: C, 42.83; H, 3.87; N, 14.04. IR:  $\nu_{max}$  (KBr): 3196, 1624, 1596, 1566, 1503, 1455, 1383, 1332, 1282, 1103, 743  $cm^{-1}$ .

### General procedure for the reversible exchange reaction of aldehydes

The solvents for the reversible exchange reactions—methanol and acetonitrile—were dried using activated 3Å molecular sieves and degassed by  $N_2$  bubbling. For the exchange reactions without acid/base regulation, two solutions (0.1 mM, 10 mL), each containing one of the above Tb(III) complexes with 1 equiv. of aldehyde, were stirred at room temperature overnight. The resulting solutions were used directly for CSI-MS measurements and diluted to 0.01 mM for photophysical measurements. For the exchange reactions using acid/base regulation, two solutions (0.01 mM, 3 mL), each containing one of the above Tb(III) complexes with 1 equiv. of aldehyde, were used for photophysical measurements. The reaction mixtures in the cells were shaken for 1 min. at room temperature after every addition of acid or base (0.15 M, 0.4  $\mu$ L each), then the emission spectra were recorded.

### Crystallography

Suitable single crystals for X-ray crystallography were obtained by vapor diffusion of  $Et_2O$  into a  $CH_3OH$  solution of **TbLPhen** and **LnLQ** to yield  $[Tb(LPhen)(NO_3)_2](NO_3) \cdot 3MeOH$  (**TbLPhen**·3MeOH) and  $[Ln(LQ)(NO_3)_2] \cdot MeOH \cdot Et_2O$  (**LnLQ**·MeOH· $Et_2O$ , **Ln** =  $Tb^{3+}$ ,  $Gd^{3+}$ ), respectively, and by vapor diffusion of  $Et_2O$  into a  $CH_3CN$ – $CH_3OH$  solution of **GdLQ** to yield  $[Gd(LPhen)(NO_3)_2](NO_3) \cdot 2CH_3CN$  (**GdLPhen**·2 $CH_3CN$ ). Data collection was performed on the Bruker SMART APEX II CCD area detector diffractometer with a graphite monochromator and  $MoK\alpha$  radiation ( $\lambda = 0.71073 \text{ \AA}$ ). Data correction was carried out at 100 K. An empirical absorption correction was applied using the SADABS-2016/2 program.<sup>2</sup> The structures were solved using intrinsic phasing (SHELXTL XT-2014/5) and refined by full-matrix least-squares calculations on  $F^2$  using SHELXTL XLMP-2017/1.<sup>3</sup> All non-hydrogen atoms were refined anisotropically. Hydrogen atoms in the core

structure were fixed in calculated positions and refined with a riding model. The crystallographic data are listed in Table S1 and the selected bond distances and angles are summarized in Table S2. CCDC 2101776, 2101777, 2101778, and 2101779, for **TbLPhen**, **GdLPhen**, **TbLQ**, and **GdLQ**, respectively, contain supplementary crystallographic data for this paper. These data can be obtained free of charge from the Cambridge Crystallographic Data Centre via [http://www.ccdc.cam.ac.uk/data\\_request/cif](http://www.ccdc.cam.ac.uk/data_request/cif).

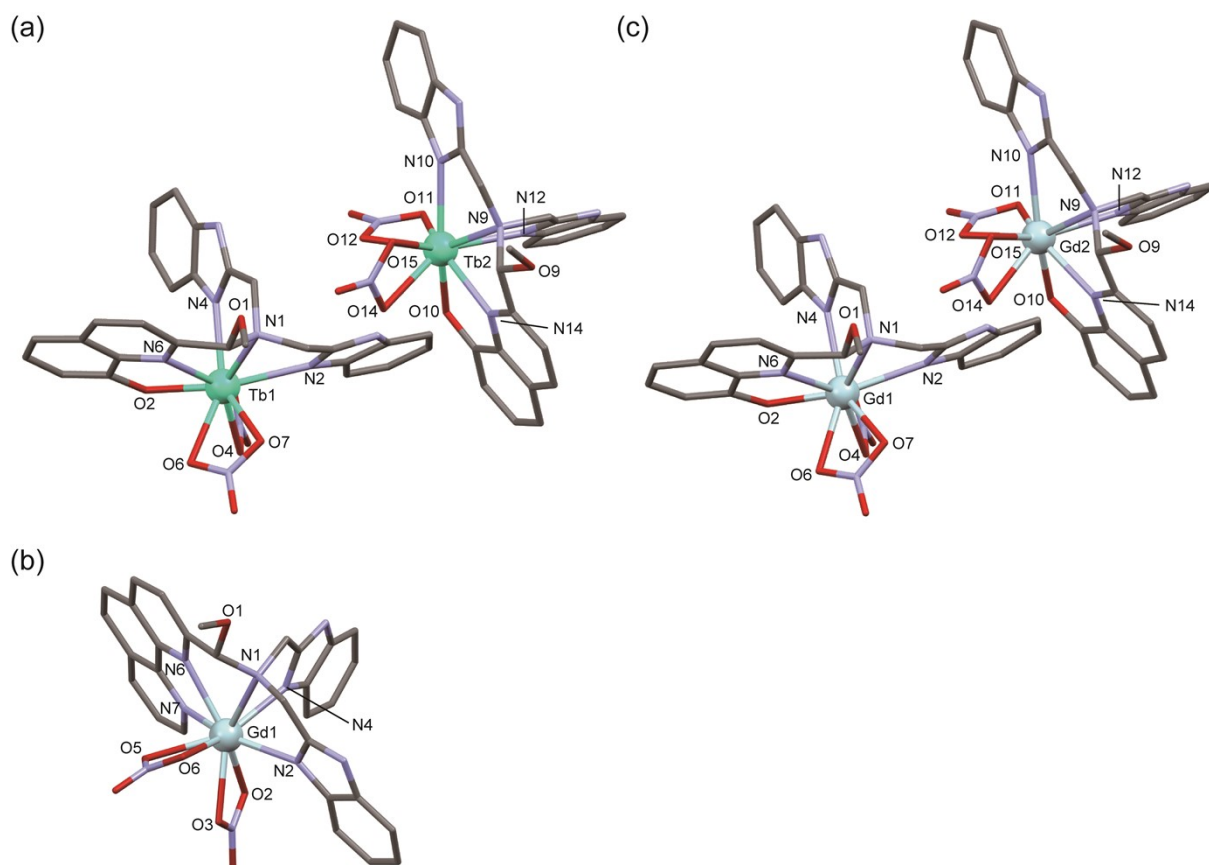

**Fig. S1** Crystal structures of (a) **TbLQ** including two crystallographically independent molecules, (b) **GdLPhen**, and (c) **GdLQ**. The counter anions, solvent molecules, and hydrogen atoms were omitted for clarity.

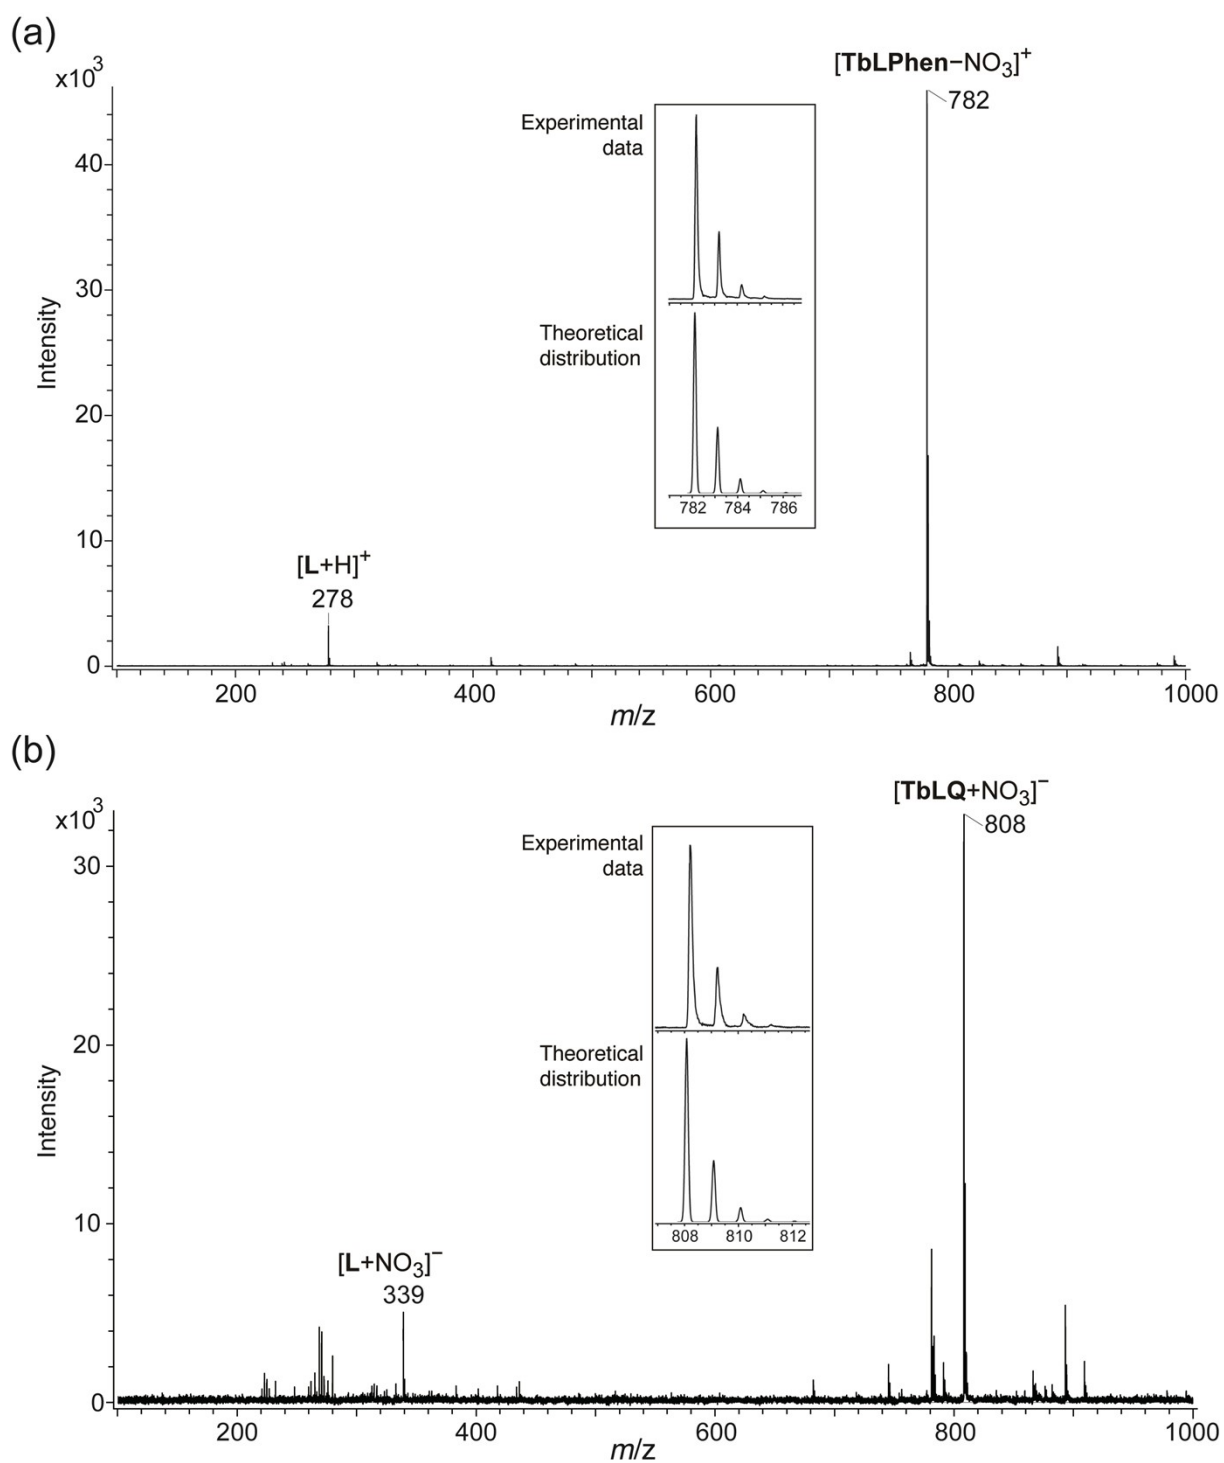

**Fig. S2** CSI-MS of (a) an acetonitrile solution including 500 equiv. methanol of **TbLPhen** in the positive ion mode, and (b) an acetonitrile-methanol (99:1) solution of **TbLQ** in the negative ion mode with sample concentrations of 0.1 mM. The experimental data and theoretical distribution patterns are shown in the inset.

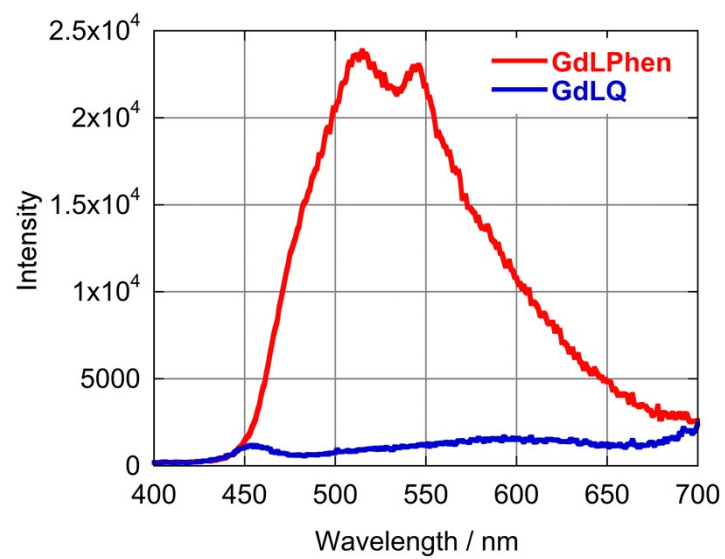

**Fig. S3** Phosphorescence spectra of **GdLPhen** and **GdLQ** in the solid state at 77 K excited at 300 nm.

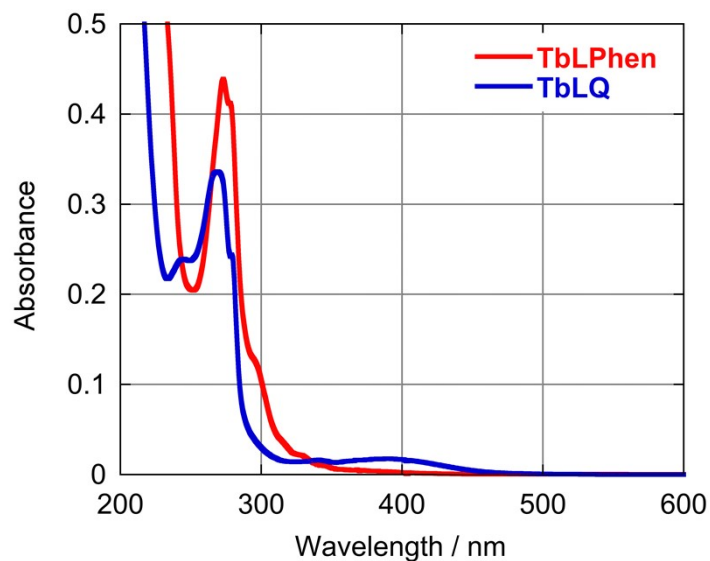

**Fig. S4** UV-Vis absorption spectra of **TbLPhen** (an acetonitrile solution including 500 equiv. methanol,  $1.0 \times 10^{-5}$  M) and **TbLQ** (an acetonitrile-methanol (99:1) solution,  $1.0 \times 10^{-5}$  M).

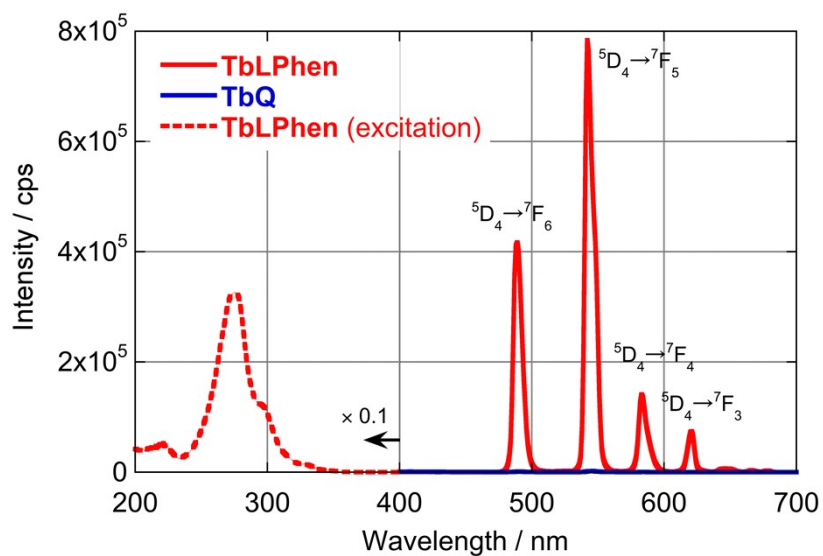

**Fig. S5** Emission spectra (solid lines) of **TbLPhen** (an acetonitrile solution including 500 equiv. methanol,  $1.0 \times 10^{-5}$  M) and **TbLQ** (an acetonitrile-methanol (99:1) solution,  $1.0 \times 10^{-5}$  M) at 298 K excited at 275 nm. Excitation spectrum for **TbLPhen** (200–400 nm, dotted line) obtained by monitoring the emission wavelength at 542 nm ( ${}^5D_4 \rightarrow {}^7F_5$ ).



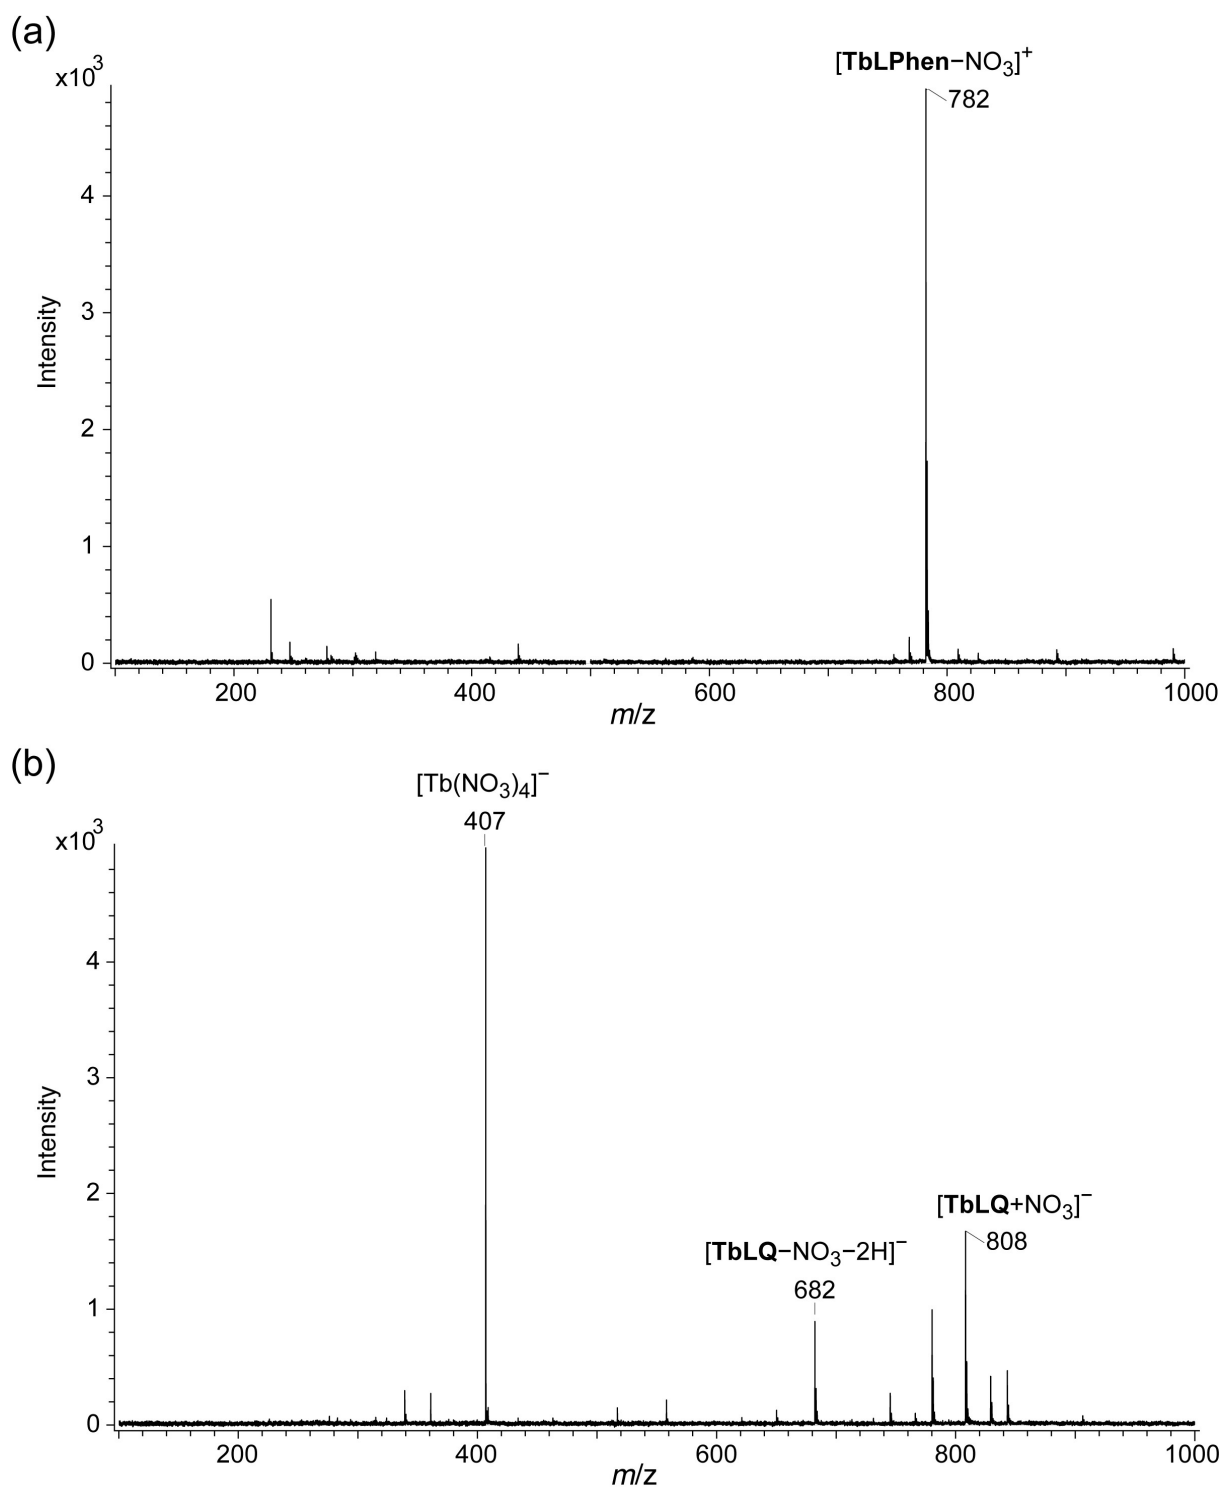

**Fig. S6** CSI-MS data of **TbLPhen** : **Q** = 1 : 1 in an acetonitrile solution including 500 equiv. methanol (a) in the positive ion mode and (b) in the negative ion mode with sample concentrations of 0.1 mM.

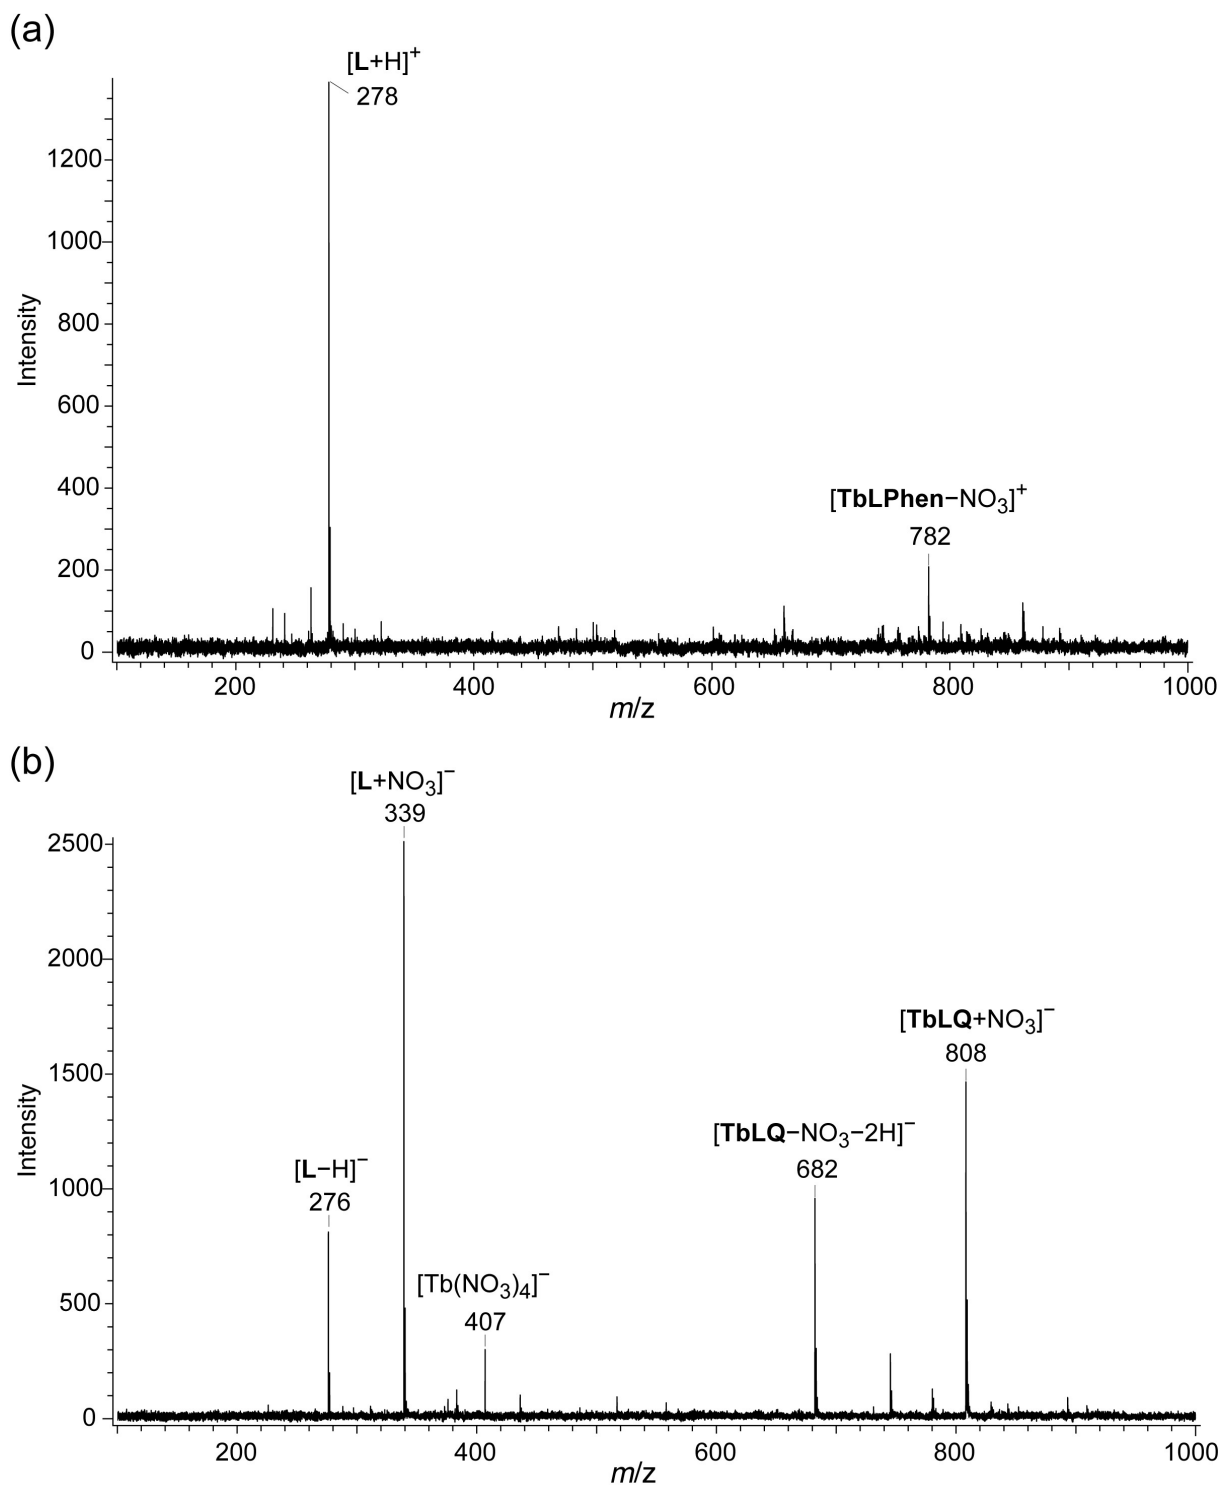

**Fig. S7** CSI-MS data of **TbLQ : Phen = 1 : 1** in an acetonitrile-methanol (99:1) solution (a) in the positive ion mode and (b) in the negative ion mode with sample concentrations of 0.1 mM.

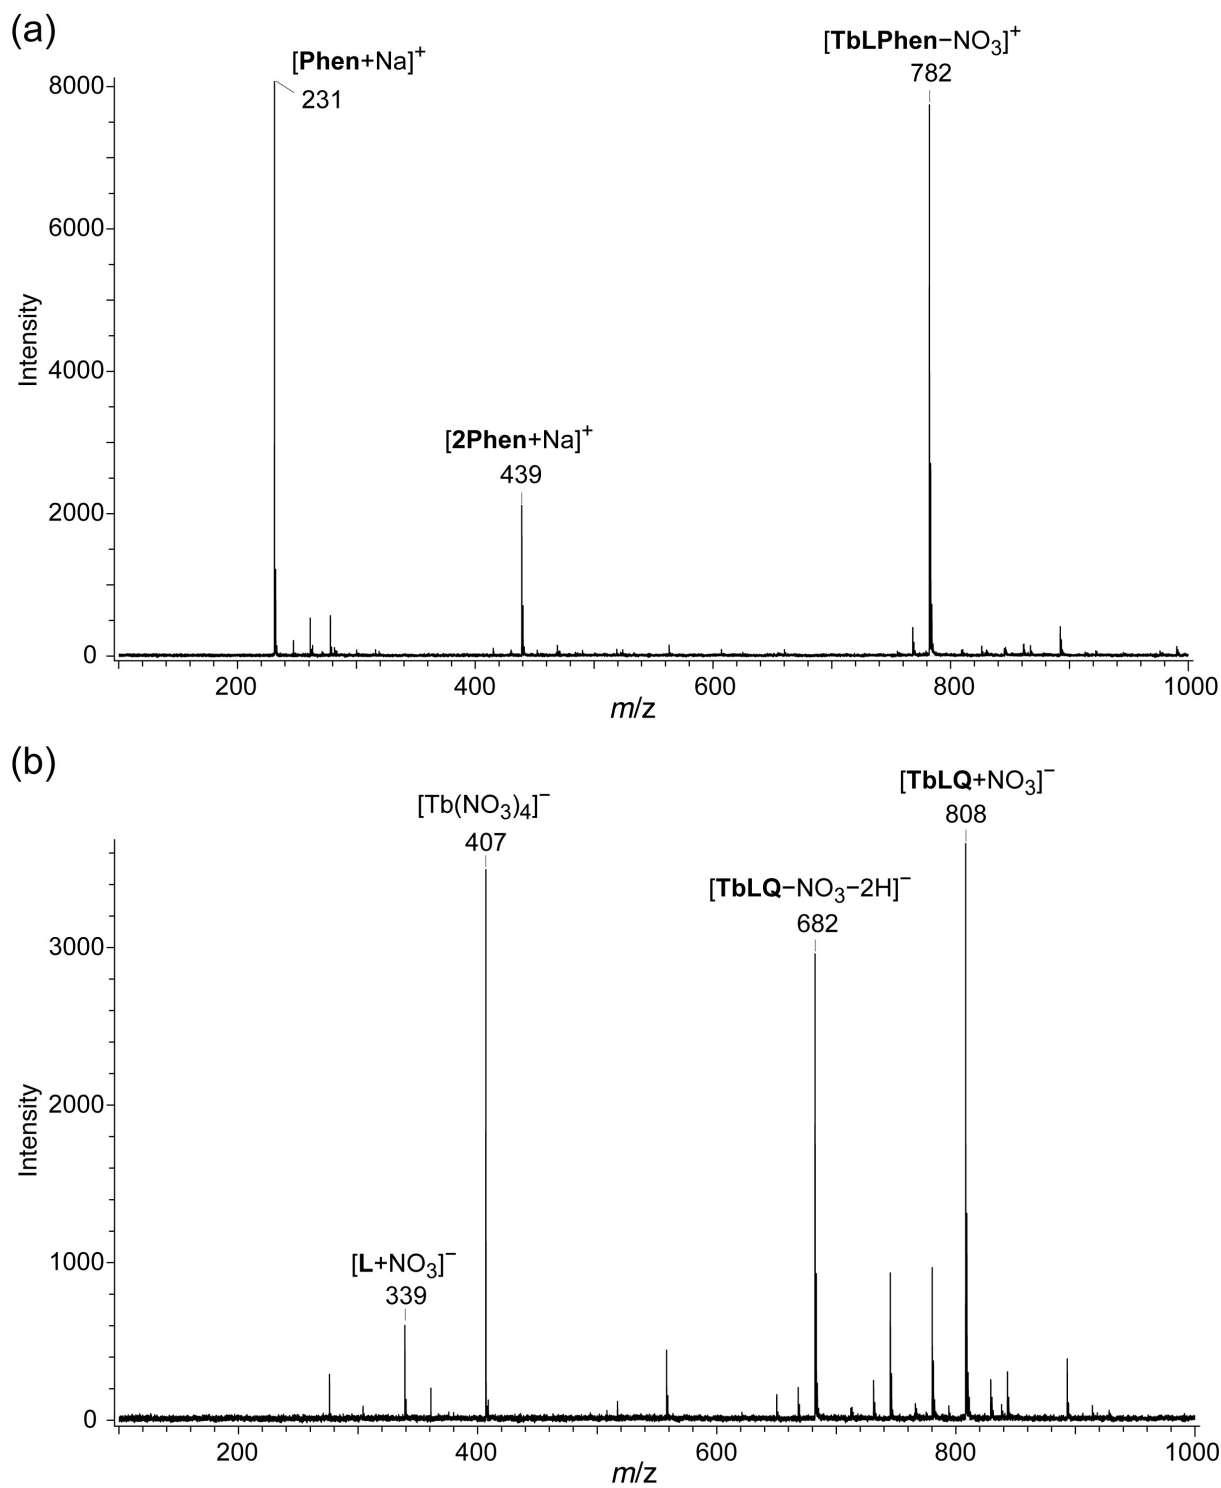

**Fig. S8** CSI-MS data of a **TbLPhen** : **Q** : NaOMe = 1 : 1 : 1 acetonitrile solution including 500 equiv. methanol (a) in the positive ion mode and (b) in the negative ion mode with sample concentrations of 0.1 mM.

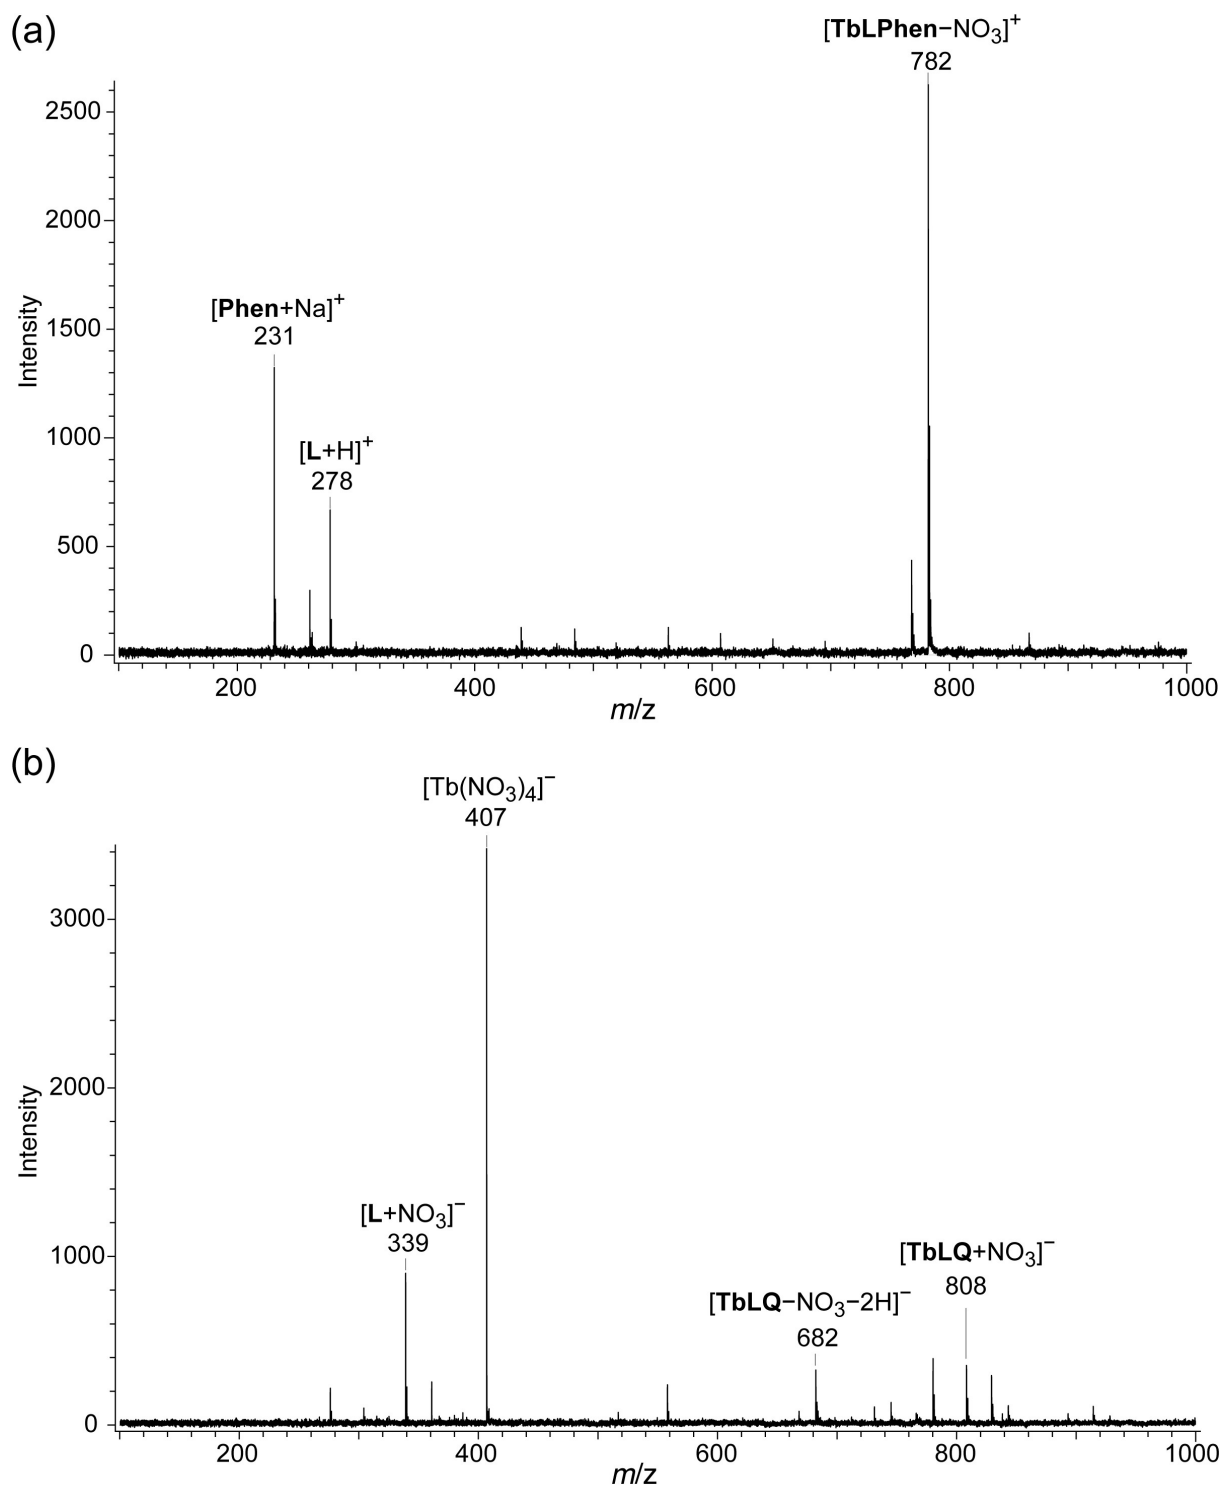

**Fig. S9** CSI-MS data of a **TbLPhen : Q : NaOMe : HNO<sub>3</sub> = 1 : 1 : 1 : 1** acetonitrile solution including 500 equiv. methanol (a) in the positive ion mode and (b) in the negative ion mode with sample concentrations of 0.1 mM.

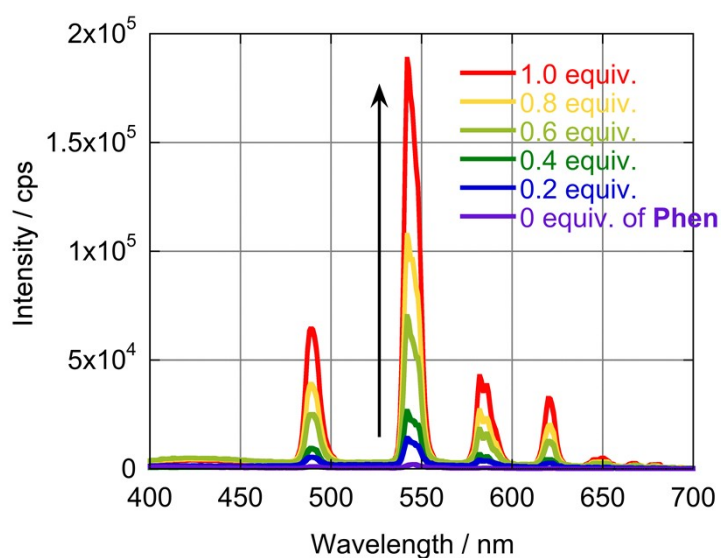

**Fig. S10** Emission changes of **TbLQ** in an acetonitrile-methanol (99:1) solution upon addition of **Phen** (0.2 equiv each addition) without the addition of acid or base.

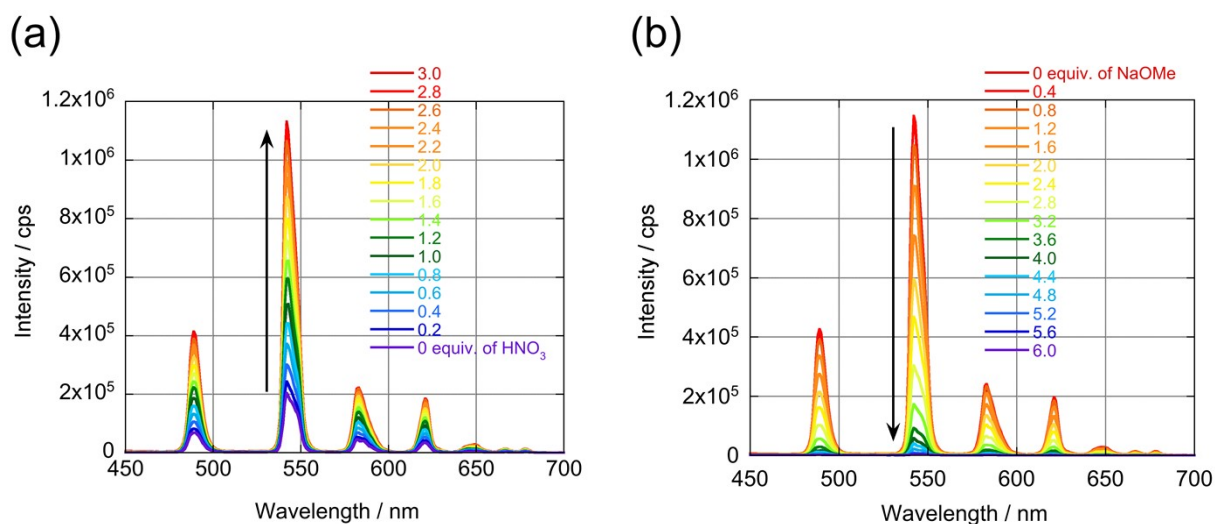

**Fig. S11** Emission changes of **TbLQ : Phen = 1 : 1** in an acetonitrile-methanol (99:1) solution (a) with the addition of  $\text{HNO}_3$  and (b) with the addition of  $\text{NaOMe}$ .

**Table S1** Crystal Data and Structure Refinement for *LnLPhen* and *LnLQ* (*Ln* = Tb and Gd)

|                                                     | <b>TbLPhen</b>                                                                       | <b>GdLPhen</b>                                                                       | <b>TbLQ</b>                                                                           | <b>GdLQ</b>                                                                          |
|-----------------------------------------------------|--------------------------------------------------------------------------------------|--------------------------------------------------------------------------------------|---------------------------------------------------------------------------------------|--------------------------------------------------------------------------------------|
| Empirical formula                                   | C <sub>33</sub> H <sub>37</sub> N <sub>10</sub> O <sub>13</sub> Tb                   | C <sub>34</sub> H <sub>31</sub> GdN <sub>12</sub> O <sub>10</sub>                    | C <sub>32</sub> H <sub>37</sub> N <sub>8</sub> O <sub>10</sub> Tb                     | C <sub>32</sub> H <sub>37</sub> GdN <sub>8</sub> O <sub>10</sub>                     |
| <i>F</i> <sub>w</sub> / g·mol <sup>-1</sup>         | 940.64                                                                               | 924.96                                                                               | 852.61                                                                                | 850.94                                                                               |
| Temperature / K                                     | 100                                                                                  | 100                                                                                  | 100                                                                                   | 100                                                                                  |
| Crystal system                                      | <i>triclinic</i>                                                                     | <i>monoclinic</i>                                                                    | <i>monoclinic</i>                                                                     | <i>monoclinic</i>                                                                    |
| Space group                                         | <i>P</i> -1                                                                          | <i>P</i> 2 <sub>1</sub> / <i>n</i>                                                   | <i>P</i> 2 <sub>1</sub> / <i>n</i>                                                    | <i>P</i> 2 <sub>1</sub> / <i>n</i>                                                   |
| <i>a</i> / Å                                        | 10.264(7)                                                                            | 10.4520(12)                                                                          | 16.1224(11)                                                                           | 16.1612(12)                                                                          |
| <i>b</i> / Å                                        | 12.525(8)                                                                            | 27.477(3)                                                                            | 25.0927(18)                                                                           | 25.1081(19)                                                                          |
| <i>c</i> / Å                                        | 15.232(10)                                                                           | 12.9143(14)                                                                          | 18.9394(13)                                                                           | 18.9535(14)                                                                          |
| <i>α</i> / °                                        | 82.512(10)                                                                           | 90                                                                                   | 90                                                                                    | 90                                                                                   |
| <i>β</i> / °                                        | 85.717(11)                                                                           | 106.006(2)                                                                           | 113.3250(10)                                                                          | 113.3990(10)                                                                         |
| <i>γ</i> / °                                        | 87.038(10)                                                                           | 90                                                                                   | 90                                                                                    | 90                                                                                   |
| <i>V</i> / Å <sup>3</sup>                           | 1934.(2)                                                                             | 3565.1(7)                                                                            | 7035.8(8)                                                                             | 7058.4(9)                                                                            |
| <i>Z</i>                                            | 2                                                                                    | 4                                                                                    | 8                                                                                     | 8                                                                                    |
| <i>D</i> <sub>calc</sub> / g·cm <sup>-3</sup>       | 1.615                                                                                | 1.723                                                                                | 1.610                                                                                 | 1.602                                                                                |
| Reflections collected                               | 14934                                                                                | 23668                                                                                | 54575                                                                                 | 54658                                                                                |
| Independent reflections ( <i>R</i> <sub>int</sub> ) | 11081 (0.0436)                                                                       | 8455 (0.0550)                                                                        | 21063 (0.0411)                                                                        | 21394 (0.0368)                                                                       |
| GOF                                                 | 1.006                                                                                | 1.025                                                                                | 1.005                                                                                 | 1.019                                                                                |
| <i>R</i> <sub>1</sub> ( <i>I</i> >2σ (all data))    | 0.0422 (0.0477)                                                                      | 0.0400 (0.0623)                                                                      | 0.0380 (0.0567)                                                                       | 0.0350 (0.0528)                                                                      |
| w <i>R</i> <sub>2</sub> ( <i>I</i> >2σ (all data))  | 0.1062 (0.1108)                                                                      | 0.0824 (0.0905)                                                                      | 0.0834 (0.0903)                                                                       | 0.0803 (0.0879)                                                                      |
| Weighting scheme                                    | $w = 1 / [\sigma^2(F_o^2) + (0.0523P)^2 + 0.6989P]$ , where $P = (F_o^2 + 2F_c^2)/3$ | $w = 1 / [\sigma^2(F_o^2) + (0.0358P)^2 + 1.3749P]$ , where $P = (F_o^2 + 2F_c^2)/3$ | $w = 1 / [\sigma^2(F_o^2) + (0.0325P)^2 + 11.8140P]$ , where $P = (F_o^2 + 2F_c^2)/3$ | $w = 1 / [\sigma^2(F_o^2) + (0.0380P)^2 + 4.6219P]$ , where $P = (F_o^2 + 2F_c^2)/3$ |
| CCDC No.                                            | 2101776                                                                              | 2101777                                                                              | 2101778                                                                               | 2101779                                                                              |

**Table S2** Selected Bond Distances (Å) and Angles (°) of *LnLPhen* and *LnLQ* (*Ln* = Tb and Gd) with Estimated Standard Deviations in Parentheses

|                    | <b>TbLPhen</b> | <b>GdLPhen</b> |                      | <b>TbLQ</b> | <b>GdLQ</b> |
|--------------------|----------------|----------------|----------------------|-------------|-------------|
| <i>Ln1</i> -N1     | 2.634(3)       | 2.664(3)       | <i>Ln1</i> -N1       | 2.699(2)    | 2.709(2)    |
| <i>Ln1</i> -N2     | 2.510(3)       | 2.505(3)       | <i>Ln1</i> -N2       | 2.557(3)    | 2.571(2)    |
| <i>Ln1</i> -N4     | 2.419(3)       | 2.408(3)       | <i>Ln1</i> -N4       | 2.413(3)    | 2.433(2)    |
| <i>Ln1</i> -N6     | 2.512(3)       | 2.521(3)       | <i>Ln1</i> -N6       | 2.474(3)    | 2.491(2)    |
| <i>Ln1</i> -N7     | 2.549(3)       | 2.584(4)       | <i>Ln1</i> -O2       | 2.297(2)    | 2.316(2)    |
| <i>Ln1</i> -O2     | 2.464(3)       | 2.432(3)       | <i>Ln1</i> -O3       | 2.466(2)    | 2.473(2)    |
| <i>Ln1</i> -O3     | 2.481(3)       | 2.530(3)       | <i>Ln1</i> -O4       | 2.469(2)    | 2.484(2)    |
| <i>Ln1</i> -O5     | 2.477(3)       | 2.466(3)       | <i>Ln1</i> -O6       | 2.537(2)    | 2.546(2)    |
| <i>Ln1</i> -O6     | 2.406(3)       | 2.438(3)       | <i>Ln1</i> -O7       | 2.445(2)    | 2.464(2)    |
|                    |                |                | <i>Ln2</i> -N9       | 2.720(3)    | 2.727(2)    |
|                    |                |                | <i>Ln2</i> -N10      | 2.537(3)    | 2.553(2)    |
|                    |                |                | <i>Ln2</i> -N12      | 2.438(3)    | 2.460(3)    |
|                    |                |                | <i>Ln2</i> -N14      | 2.477(3)    | 2.495(2)    |
|                    |                |                | <i>Ln2</i> -O10      | 2.293(2)    | 2.309(2)    |
|                    |                |                | <i>Ln2</i> -O11      | 2.479(2)    | 2.483(2)    |
|                    |                |                | <i>Ln2</i> -O12      | 2.439(2)    | 2.454(2)    |
|                    |                |                | <i>Ln2</i> -O14      | 2.518(3)    | 2.524(2)    |
|                    |                |                | <i>Ln2</i> -O15      | 2.423(3)    | 2.441(3)    |
|                    | <b>TbLPhen</b> | <b>GdLPhen</b> |                      | <b>TbLQ</b> | <b>GdLQ</b> |
| N1- <i>Ln1</i> -N2 | 66.56(9)       | 66.07(10)      | N1- <i>Ln1</i> -N2   | 65.36(8)    | 65.19(7)    |
| N1- <i>Ln1</i> -N4 | 69.80(10)      | 68.77(11)      | N1- <i>Ln1</i> -N4   | 68.41(8)    | 68.09(7)    |
| N1- <i>Ln1</i> -N6 | 63.45(9)       | 62.75(10)      | N1- <i>Ln1</i> -N6   | 63.03(8)    | 62.91(7)    |
| N1- <i>Ln1</i> -N7 | 123.57(9)      | 121.62(10)     | N1- <i>Ln1</i> -O2   | 127.98(8)   | 127.47(7)   |
| N2- <i>Ln1</i> -N4 | 75.36(10)      | 76.40(11)      | N2- <i>Ln1</i> -N4   | 80.77(8)    | 80.63(7)    |
|                    |                |                | N9- <i>Ln2</i> -N10  | 66.42(8)    | 66.14(7)    |
|                    |                |                | N9- <i>Ln2</i> -N12  | 68.02(9)    | 67.74(8)    |
|                    |                |                | N9- <i>Ln2</i> -N14  | 62.15(8)    | 62.03(7)    |
|                    |                |                | N9- <i>Ln2</i> -O10  | 127.06(8)   | 126.62(7)   |
|                    |                |                | N10- <i>Ln2</i> -N12 | 84.31(9)    | 83.91(8)    |

## References

1. R. Cariou, J. J. Chirinos, V. C. Gibson, G. Jacobsen, A. K. Tomov, G. J. P. Britovsek, and A. J. P. White, *Dalton Trans.*, 2010, **39**, 9039–9045.
2. G. M. Sheldrick, *SADABS, Empirical Absorpt. Correct. program*, Univ. Göttingen, 1997.
3. G. M. Sheldrick, *Acta Crystallogr. Sect. C Struct. Chem.*, 2015, **71**, 3–8.
